# Supplementary material
Source: MDPI journal article supplement (https://www.mdpi.com/2072-666X/5/3/766)

## Supplementary Materials

**Figure S1.** Mylar film fastened around an aluminum (1.78 mm-thick) ring. After fastening, the film is rigid enough to support spin coating of SU-8.

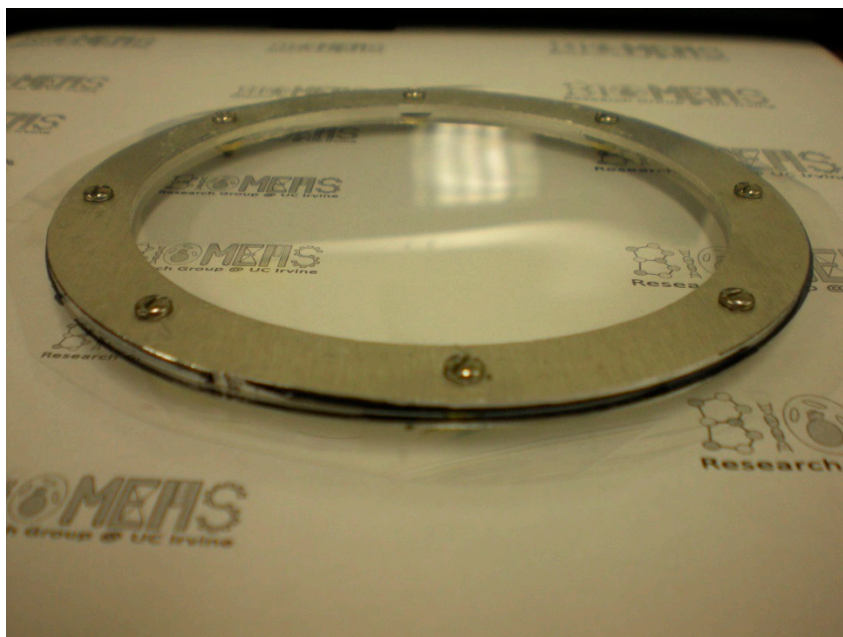

**Figure S2.** Examples of free-standing SU-8 structures. The specimens shown are 1-cm squares featuring topographies of different dimensions.

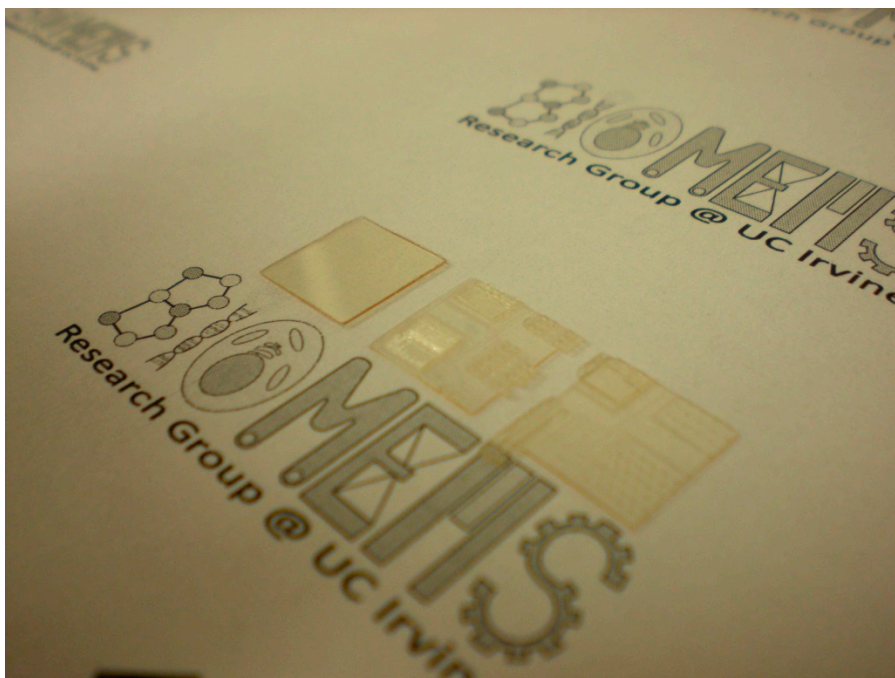

Supplement: s1 [file s1]
